# Supplementary material
Source: Research Square preprint supplement (doi:10.21203/rs.3.rs-9842189/v1)
Supplement: Supplementary file 1 [file c7dfa160f9b91ad2f2a55af2.pdf]

# An Exploration of Masculinity among India's Youth, The Man Box

Individuals who are studying in college or university are required to complete this questionnaire. The objective of the study is to understand how young adults perceive masculinity.

## Respondent Consent:

1. I voluntarily agree to participate in this study.
2. I understand that even if I agree to participate now, I can withdraw at any time without any consequences.
3. I have received an explanation of the study's purpose and nature, and I have had the opportunity to ask questions about it.
4. I understand that this study will treat all information I have provided as confidential and use it only for this study purpose.
5. I understand that my identity in any of the results and reports of this research will remain anonymous.
6. I understand that the researcher will confidentially retain the consent forms, original audio recordings, and transcripts in their database for the purpose of obtaining ethical clearance for the study.

For further clarification, please contact: [REDACTED]

Mobile No.: [REDACTED]

Email ID: [REDACTED]

*\* Indicates required question*

---

1. I agree to the consent form \*

*Mark only one oval.*

Yes

2. Age \*
-

3. Gender \*

*Mark only one oval.*

- Women
- Men
- Trans - Women
- Trans - Men
- Other:  
\_\_\_\_\_

4. Sexual Orientation \*

*Mark only one oval.*

- Heterosexual
- Bisexual
- Homosexual
- Pansexual
- Asexual
- Prefer not to mention
- Don't Know
- Other:  
\_\_\_\_\_

5. Nationality \*

*Mark only one oval.*

- Indian
- Other:  
\_\_\_\_\_

6. Native Language \*

Dropdown

*Mark only one oval.*

- Assamese
- Bengali
- Bodo
- Dogri
- Gujarati
- Hindi
- Kannada
- Kashmiri
- Konkani
- Malayalam
- Manipuri
- Marathi
- Maithili
- Nepali
- Oriya
- Punjabi
- Sanskrit
- Santhali
- Sindhi
- Tamil
- Telugu
- Urdu
- Others

7. State and Union Territories \*

Dropdown

*Mark only one oval.*

- Andhra Pradesh
- Arunachal Pradesh
- Assam
- Bihar
- Chhattisgarh
- Goa
- Gujarat
- Haryana
- Himachal Pradesh
- Jharkhand
- Karnataka
- Kerala
- Madhya Pradesh
- Maharashtra
- Manipur
- Meghalaya
- Mizoram
- Nagaland
- Odisha
- Punjab
- Rajasthan
- Sikkim
- Tamil Nadu
- Telangana

- Tripura
- Uttarakhand
- Uttar Pradesh
- West Bengal
- Andaman and Nicobar Islands
- Chandigarh
- Dadra and Nagar Haveli and Daman & Diu
- Delhi
- Jammu & Kashmir
- Ladakh
- Lakshadweep
- Puducherry

8. Religion/Non Religious \*

*Mark only one oval.*

- Atheist
- Buddhism
- Christian
- Hindu
- Islam
- Jainism
- Sikh
- Other:  
\_\_\_\_\_

9. Community \*

Mark only one oval.

- Scheduled Tribe (ST)
- Scheduled Caste (SC)
- Other Backward Class (OBC)
- Forward Class
- Prefer not to say
- Other:  
\_\_\_\_\_

10. Are you a Person having any Disability \*

Mark only one oval.

- Yes
- No

11. Monthly Family Income \*

 Dropdown

Mark only one oval.

- $\geq 1,35,169$  Above
- 67,587 - 1,35,168
- 50,560 - 67,586
- 33,793 - 50,559
- 20,274 - 33,792
- 6,768 - 20,273
- $\leq 6,767$  Below

12. Course/Designation \*

---

13. Name of the Institution \*

---

14. Mobile Number \*

---

15. Email id

---

### THE MAN BOX

16. A man who talks a lot about his worries, fears, and problems shouldn't really get respect. \*

*Mark only one oval.*

Strongly Agree

Agree

Disagree

Strongly Disagree

17. Men should figure out their personal problems on their own without asking others for help. \*

*Mark only one oval.*

- Strongly Agree
- Agree
- Disagree
- Strongly Disagree

18. A guy who doesn't fight back when others push him around is weak. \*

*Mark only one oval.*

- Strongly Agree
- Agree
- Disagree
- Strongly Disagree

19. Guys should act strong even if they feel scared or nervous inside. \*

*Mark only one oval.*

- Strongly Agree
- Agree
- Disagree
- Strongly Disagree

20. It is very hard for a man to be successful if he doesn't look good. \*

*Mark only one oval.*

- Strongly Agree
- Agree
- Disagree
- Strongly Disagree

21. A guy who spends a lot of time on his looks isn't very manly. \*

*Mark only one oval.*

- Strongly Agree
- Agree
- Disagree
- Strongly Disagree

22. Women don't go for guys who fuss too much about their clothes, hair and skin. \*

*Mark only one oval.*

- Strongly Agree
- Agree
- Disagree
- Strongly Disagree

23. It is not good for a boy to be taught how to cook, sew, clean the house or take care of younger children. \*

*Mark only one oval.*

- Strongly Agree
- Agree
- Disagree
- Strongly Disagree

24. A man shouldn't have to do household chores. \*

*Mark only one oval.*

- Strongly Agree
- Agree
- Disagree
- Strongly Disagree

25. In heterosexual relationships, men should really be the ones to bring money home to provide for their families, not women. \*

*Mark only one oval.*

- Strongly Agree
- Agree
- Disagree
- Strongly Disagree

26. A gay guy is not a “real man”. \*

*Mark only one oval.*

- Strongly Agree
- Agree
- Disagree
- Strongly Disagree

27. A transgender man is not a “real man”. \*

*Mark only one oval.*

- Strongly Agree
- Agree
- Disagree
- Strongly Disagree

28. It's not OK for straight guys to be friends with gay guys. \*

*Mark only one oval.*

- Strongly Agree
- Agree
- Disagree
- Strongly Disagree

29. It's not OK for straight guys to be friends with trans or gender diverse people. \*

*Mark only one oval.*

- Strongly Agree
- Agree
- Disagree
- Strongly Disagree

30. A "real man" should have as many sexual partners as he can. \*

*Mark only one oval.*

- Strongly Agree
- Agree
- Disagree
- Strongly Disagree

31. A "real man" would never say no to sex. \*

*Mark only one oval.*

- Strongly Agree
- Agree
- Disagree
- Strongly Disagree

32. Men should use violence to get respect if necessary. \*

*Mark only one oval.*

- Strongly Agree
- Agree
- Disagree
- Strongly Disagree

33. In heterosexual relationships, a man should always have the final say about decisions in his relationship or marriage. \*

*Mark only one oval.*

- Strongly Agree
- Agree
- Disagree
- Strongly Disagree

34. If a guy has a girlfriend or wife, he deserves to know where she is all the time. \*

*Mark only one oval.*

- Strongly Agree
- Agree
- Disagree
- Strongly Disagree

35. What are the qualities that well define manliness?

*Check all that apply.*

- Tough
- Aggressive
- Brave
- Independent
- Fearless
- Dominating
- Assertive
- Violent
- Rational
- Emotional
- Caring
- Polite
- Shy
- Submissive
- Dependent
- Outgoing
- Competitive
- Tolerant
- Beautiful
- Soft
- Fearful
- Other: \_\_\_\_\_

---

This content is neither created nor endorsed by Google.

Google Forms
